# Supplementary material for: In vitro study on the response of RAW264.7 and MS-5 fibroblast cells on laser-induced periodic surface structures for stainless steel alloys
Source: Royal Society of Chemistry journal article supplement (doi:10.1039/c5ra04342e), 2015-01-01
Supplement: c5ra04342e1.pdf [file c5ra04342e1.pdf]

Supplementary Information

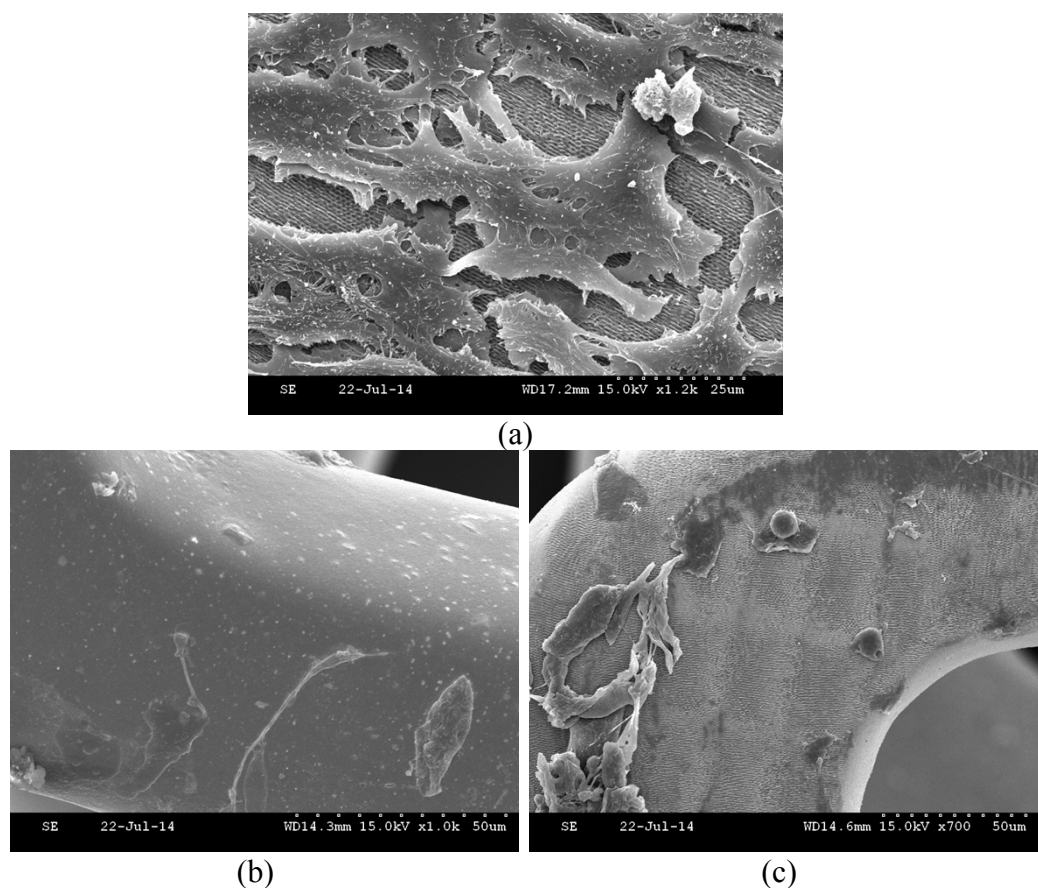

**Fig A.** HPMEC cells attached to (a) flat SS, (b) bare Pt:SS stent and (c) LIPSS covered Pt:SS stent generated at 1030 nm.
